# Supplementary material for: Convergence of independent DISC1 mutations on impaired neurite growth via decreased UNC5D expression
Source: PubMed Central journal article supplement (PMC6224395; doi:10.1038/s41398-018-0281-9), 2018-11-08

# Supplementary Figure 2

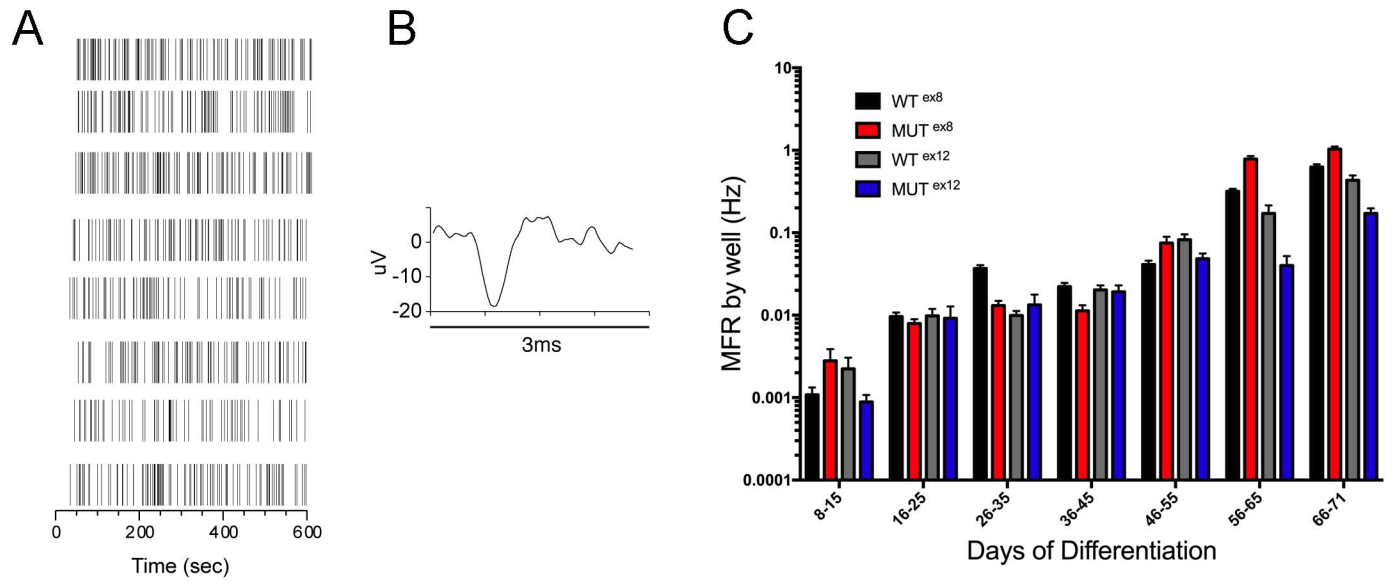

Supplement: 41398_2018_281_MOESM3_ESM.pdf [file 41398_2018_281_MOESM3_ESM.pdf]
